# Supplementary material for: Early Origins of Autism Comorbidity: Neuropsychiatric Traits Correlated in Childhood Are Independent in Infancy
Source: Springer Nature journal article supplement (doi:10.1007/s10802-018-0410-1), 2018-03-16
Supplement: MOESM4 [file 15540692]

**Early origins of autism comorbidity: Neuropsychiatric traits correlated in childhood are independent in infancy, *Journal of Abnormal Child Psychology***

**Online Resource 4**

Pearson product-moment correlations ( $n_{\text{twins}} = 154$ ) among measures of general psychopathology and QATs at baseline in co-twins

|                   | Externalizing | Internalizing | Dysregulation | Behavior Problem | Competence | SCI     | RRB     | RSB |
|-------------------|---------------|---------------|---------------|------------------|------------|---------|---------|-----|
| Externalizing     | 1             |               |               |                  |            |         |         |     |
| Internalizing     | 0.13          | 1             |               |                  |            |         |         |     |
| Dysregulation     | 0.54***       | 0.39***       | 1             |                  |            |         |         |     |
| Behavior Problems | 0.71***       | 0.59***       | 0.87***       | 1                |            |         |         |     |
| Competence        | -0.02         | 0.13          | 0.08          | 0.14             | 1          |         |         |     |
| SCI               | 0.03          | 0.31***       | 0.24**        | 0.29***          | 0.74***    | 1       |         |     |
| RRB               | 0.25**        | 0.33***       | 0.38***       | 0.47***          | 0.31***    | 0.53*** | 1       |     |
| RSB               | 0.10          | 0.35***       | 0.31***       | 0.37***          | 0.70***    | 0.97*** | 0.72*** | 1   |

\*\*\*  $p < 0.001$ , \*\*  $p < 0.01$ , \*  $p < 0.05$
