# Supplementary material for: Early Origins of Autism Comorbidity: Neuropsychiatric Traits Correlated in Childhood Are Independent in Infancy
Source: Springer Nature journal article supplement (doi:10.1007/s10802-018-0410-1), 2018-03-16
Supplement: MOESM5 [file 15540692]

**Early origins of autism comorbidity: Neuropsychiatric traits correlated in childhood are independent in infancy, *Journal of Abnormal Child Psychology***

**Online Resource 5**

Results of exploratory factor analyses ( $n_{\text{twins}} = 154$ ) on BITSEA and vrRSB subscales at 18 months

|          | $\chi^2$ | Df | TLI   | RMSEA | 95% CI     | RMSR | BIC    | Cum. Var. (%) |
|----------|----------|----|-------|-------|------------|------|--------|---------------|
| 1 factor | 86.24    | 9  | 0.397 | 0.24  | (.19, .28) | 0.17 | 40.91  | 29            |
| 2 factor | 4.42     | 4  | 0.993 | 0.03  | [0.0, .13) | 0.03 | -15.73 | 50            |

$\chi^2$  = chi-square; Df = degrees of freedom; TLI = Tucker Lewis Index; RMSEA = root mean square error of approximation; 95% CI = 95% confidence interval; RMSR = root mean square of the residuals; BIC = Bayesian information criterion; Cum. Var. = cumulative variance
