# Supplementary material for: Early Origins of Autism Comorbidity: Neuropsychiatric Traits Correlated in Childhood Are Independent in Infancy
Source: Springer Nature journal article supplement (doi:10.1007/s10802-018-0410-1), 2018-03-16
Supplement: MOESM7 [file 15540692]

**Early origins of autism comorbidity: Neuropsychiatric traits correlated in childhood are independent in infancy, *Journal of Abnormal Child Psychology***

**Online Resource 7**

Results of exploratory factor analyses ( $n_{\text{twins}} = 154$ ) on BITSEA and vrRSB subscales at baseline in co-twins

|          | $\chi^2$ | Df | TLI   | RMSEA | 95% CI     | RMSR | BIC    | Cumulative variance (%) |
|----------|----------|----|-------|-------|------------|------|--------|-------------------------|
| 1 factor | 112.31   | 9  | 0.390 | 0.276 | (.23, .32) | 0.18 | 66.86  | 33                      |
| 2 factor | 8.46     | 4  | 0.941 | 0.087 | [0.0, .17] | 0.04 | -11.74 | 55                      |

$\chi^2$  = chi-square; Df = degrees of freedom; TLI = Tucker Lewis Index; RMSEA= root mean square error of approximation; 95% CI = 95% confidence interval; RMSR = root mean square of the residuals; BIC = Bayesian information criterion
