# Supplementary material for: Early Origins of Autism Comorbidity: Neuropsychiatric Traits Correlated in Childhood Are Independent in Infancy
Source: Springer Nature journal article supplement (doi:10.1007/s10802-018-0410-1), 2018-03-16

**Early origins of autism comorbidity: Neuropsychiatric traits correlated in childhood are independent in infancy, *Journal of Abnormal Child Psychology***

**Online Resource 8** Factor structure at baseline in co-twins. The data were best described by a 2-factor model, with *SCI*, *Competence*, and *RRB* comprising a “social adaptation” factor and *Dysregulation*, *Internalizing*, and *Externalizing* indices comprising a “behavior problems” factor. This structure is largely consistent with data from twins (Fig. 1), however in co-twins *RRB* loads onto “social competencies” rather than “behavior problems.” Given psychometric limitations associated with measurement of *RRB* in very young typically-developing children (Marrus et al., 2015), instability was not altogether surprising, and *RRB* was excluded from subsequent analyses

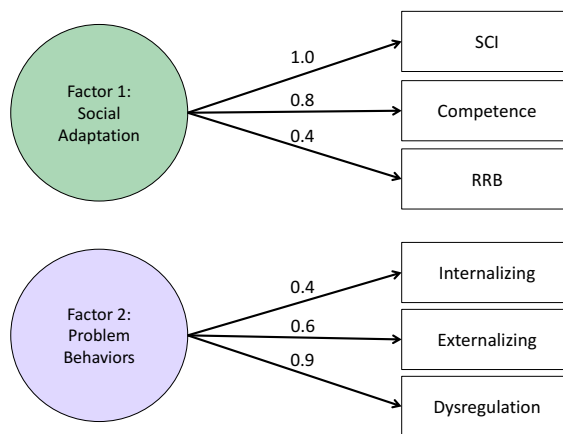

Supplement: MOESM8 [file 15540692]
