# Supplementary material for: Early Origins of Autism Comorbidity: Neuropsychiatric Traits Correlated in Childhood Are Independent in Infancy
Source: Springer Nature journal article supplement (doi:10.1007/s10802-018-0410-1), 2018-03-16
Supplement: MOESM9 [file 15540692]

**Early origins of autism comorbidity: Neuropsychiatric traits correlated in childhood are independent in infancy, *Journal of Abnormal Child Psychology***

**Online Resource 9**

Twin correlations ( $r_{MZ}$  and  $r_{DZ}$ ), associated confidence intervals (5%, 95%), and Falconer's heritability estimates ( $H^2$ ) for *RRB* at 18 months

| RRB           | $n_{\text{pairs}}$ | Falconer's heritability |                  | $H^2$ |
|---------------|--------------------|-------------------------|------------------|-------|
|               |                    | $r_{MZ}$                | $r_{DZ}$         |       |
| Male/Male     | 58                 | 0.91 (.82, .96)         | 0.50 (.17, .72)  | 0.83  |
| Male/Female   | 36                 | NA                      | 0.09 (-.24, .41) | NA    |
| Female/Female | 56                 | 0.48 (.13, .73)         | 0.15 (-.22, .48) | 0.48  |
| All           | 150                | 0.83 (.72, .89)         | 0.31 (.12, .48)  | 0.83  |

$n_{\text{pairs}}$  = number of twin pairs; MZ = monozygotic; DZ = dizygotic;  $H^2$  = broad heritability
