# Supplementary material for: Early Origins of Autism Comorbidity: Neuropsychiatric Traits Correlated in Childhood Are Independent in Infancy
Source: Springer Nature journal article supplement (doi:10.1007/s10802-018-0410-1), 2018-03-16
Supplement: MOESM10 [file 15540692]

**Early origins of autism comorbidity: Neuropsychiatric traits correlated in childhood are independent in infancy, *Journal of Abnormal Child Psychology***

**Online Resource 10** Construct overlap among *SCI*, *Behavior Problems*, and *Competence* indices at 18 months

|                             | SCI at 18 months                                                                         |                         |                                      | Behavior Problems at 18 months                                                      |                         |                                 | Competence at 18 months                                                              |                       |                               |
|-----------------------------|------------------------------------------------------------------------------------------|-------------------------|--------------------------------------|-------------------------------------------------------------------------------------|-------------------------|---------------------------------|--------------------------------------------------------------------------------------|-----------------------|-------------------------------|
|                             | Model 1A:<br>Problems                                                                    | Model 1B:<br>Competence | Model 2:<br>Problems +<br>Competence | Model 2A:<br>SCI                                                                    | Model 2B:<br>Competence | Model 3:<br>SCI +<br>Competence | Model 4A:<br>SCI                                                                     | Model 4B:<br>Problems | Model 5:<br>SCI +<br>Problems |
| Problems                    |                                                                                          |                         |                                      |                                                                                     |                         |                                 |                                                                                      |                       |                               |
| <i>Estimate</i>             | 0.29***                                                                                  | NA                      | 0.21***                              | NA                                                                                  | NA                      | NA                              | NA                                                                                   | -0.11*                | 0.09*                         |
| <i>SE</i>                   | (.06)                                                                                    | NA                      | (.04)                                | NA                                                                                  | NA                      | NA                              | NA                                                                                   | (.06)                 | (.04)                         |
| Competence                  |                                                                                          |                         |                                      |                                                                                     |                         |                                 |                                                                                      |                       |                               |
| <i>Estimate</i>             | NA                                                                                       | -0.72***                | -0.70***                             | NA                                                                                  | -0.11*                  | 0.16*                           | NA                                                                                   | NA                    | NA                            |
| <i>SE</i>                   | NA                                                                                       | (.04)                   | (.04)                                | NA                                                                                  | (.06)                   | (.08)                           | NA                                                                                   | NA                    | NA                            |
| SCI                         |                                                                                          |                         |                                      |                                                                                     |                         |                                 |                                                                                      |                       |                               |
| <i>Estimate</i>             | NA                                                                                       | NA                      | NA                                   | 0.27***                                                                             | NA                      | 0.38***                         | -0.63***                                                                             | NA                    | -0.71***                      |
| <i>SE</i>                   | NA                                                                                       | NA                      | NA                                   | (.05)                                                                               | NA                      | (.07)                           | (.04)                                                                                | NA                    | (.04)                         |
| AIC                         | 800.84                                                                                   | 615.61                  | 590.73                               | 784.76                                                                              | 806.53                  | 782.21                          | 630.38                                                                               | 803.64                | 596.91                        |
| BIC                         | 815.79                                                                                   | 630.56                  | 609.41                               | 799.70                                                                              | 821.47                  | 800.90                          | 645.33                                                                               | 818.59                | 615.59                        |
| Log Likelihood              | -396.42                                                                                  | -303.80                 | -290.36                              | -388.38                                                                             | -399.26                 | -386.11                         | -311.19                                                                              | -397.82               | -293.45                       |
| Num. obs                    | 310                                                                                      | 310                     | 310                                  | 310                                                                                 | 310                     | 310                             | 310                                                                                  | 310                   | 310                           |
| Num. groups: Twin pairs     | 156                                                                                      | 156                     | 156                                  | 156                                                                                 | 156                     | 156                             | 156                                                                                  | 156                   | 156                           |
| Var: Twin pairs (Intercept) | 0.52                                                                                     | 0.23                    | 0.21                                 | 0.59                                                                                | 0.63                    | 0.57                            | 0.31                                                                                 | 0.61                  | 0.25                          |
| Var: Residual               | 0.40                                                                                     | 0.25                    | 0.23                                 | 0.34                                                                                | 0.36                    | 0.34                            | 0.23                                                                                 | 0.37                  | 0.21                          |
| Marginal R <sup>2</sup>     | 0.08                                                                                     | 0.52                    | 0.56                                 | 0.07                                                                                | 0.01                    | 0.08                            | 0.49                                                                                 | 0.01                  | 0.50                          |
| Unique R <sup>2</sup>       | 0.04                                                                                     | 0.48                    | NA                                   | 0.07                                                                                | 0.01                    | NA                              | 0.49                                                                                 | 0.01                  | NA                            |
| Model comparisons           | Mod 2 > Mod 1A,<br>$\chi^2 = 212.11^{***}$<br>Mod 2 > Mod 1B,<br>$\chi^2 = 26.881^{***}$ |                         |                                      | Mod 2 > Mod 1A,<br>$\chi^2 = 4.546^*$<br>Mod 2 > Mod 1B,<br>$\chi^2 = 26.313^{***}$ |                         |                                 | Mod 2 > Mod 1A,<br>$\chi^2 = 5.0243^*$<br>Mod 2 > Mod 1B,<br>$\chi^2 = 208.73^{***}$ |                       |                               |

\*\*\*  $p < 0.001$ , \*\*  $p < 0.01$ , \*  $p < 0.05$ ;  $\chi^2 =$  chi-squared; marginal R<sup>2</sup> = variance accounted for by fixed factors (i.e., Problems, Competence); unique R<sup>2</sup> = non-overlapping variance. Unique R<sup>2</sup> values approximating overlap between SCI and Behavior Problems are coded blue, values approximating overlap between SCI and Competence are coded orange, and values approximating overlap between Behavior Problems and Competence are coded green
